# Supplementary material for: Intensity of Humoral Immune Responses, Adverse Reactions, and Post-Vaccination Morbidity after Adenovirus Vector-Based and mRNA Anti-COVID-19 Vaccines
Source: MDPI journal article supplement (doi:10.3390/vaccines10081268), 2022-08-06
Supplement: s1 [file s1]

**Supplementary table S1.** Multivariate analyses of adverse side effects and intensity of anti-SARS-CoV-2 IgG responses after vaccination with adenovirus vector-based (Ad26.COVS.2, ChAdOx1 nCoV-19) and mRNA (BNT162b2) vaccines on day 42 after vaccination

| Parameter                                | N, median IgG levels (mg/dL) (IQR)                                                                                | <i>p</i> 1 | Coefficient, 95% CI                                                              | <i>p</i> 2* | Coefficient, 95% CI                                                             |
|------------------------------------------|-------------------------------------------------------------------------------------------------------------------|------------|----------------------------------------------------------------------------------|-------------|---------------------------------------------------------------------------------|
| Age (years)                              | rho=-0.187                                                                                                        | 0.577      | -32.1<br>(-145.3 , 81.2)                                                         | 0.095       | -89.8<br>(-195.5 , 16.0)                                                        |
| Vaccination                              | BNT162b2:135, 10576.2<br>(15420.4)<br>Ad26.COVS.2: 68, 436.5<br>(1095.7)<br>ChAdOx1 nCoV-19: 67, 281.0<br>(552.3) | <0.001     | (Ad26.COVS.2, ChAdOx1<br>nCoV-19 / BNT162b2)<br>-10203.6<br>(-12729.4 , -7687.8) | <0.001      | (Ad26.COVS.2, ChAdOx1<br>nCoV-19 / BNT162b2)<br>-9328.1<br>(-11636.9 , -7019.2) |
| Comorbidity<br>(no vs ≥ 1)               | ≥ 1: 134, 1682.6 (8096.1)<br>No:136, 3632.8 (13075.0)                                                             | 0.555      | -895.9<br>(-3886.7 , 2095.0)                                                     | 0.265       | -1584.3<br>(-4383.0 , 1214.3)                                                   |
| Localpain_2                              | Yes: 34, 9192.6 (14174.9)<br>No: 135, 3893.2 (12751.8)                                                            |            |                                                                                  |             |                                                                                 |
| Fever_2                                  | Yes: 15, 20378.3 (34830.1)<br>No:185, 4523.6 (12837.2)                                                            | 0.005      | 6297.6<br>(1981.2 , 10614.1)                                                     | 0.070       | 4075.6<br>(-330.6 , 8481.7)                                                     |
| Myalgias_2                               | Yes:17, 17718.2 (14188.6)<br>No: 152, 3545.3 (11935.7)                                                            | 0.482      | 1705.1<br>(-3069.3 , 6479.6)                                                     | 0.187       | 3171.8<br>(-1560.5 , 7904.1)                                                    |
| Fatigue_2                                | Yes:28, 14674.9 (20022.0)<br>No:141, 3267.5 (10941.2)                                                             | 0.049      | 3780.4<br>(17.2, 7543.6)                                                         | 0.141       | 2630.0<br>(-868.1 , 6146.1)                                                     |
| Headache_2                               | Yes: 6, 10344.8 (13898.1)<br>No: 163, 4957.9 (13155.9)                                                            |            |                                                                                  |             |                                                                                 |
| Flulike_2                                | Yes: 1<br>No: 168, 4980.1 (13385.7)                                                                               |            |                                                                                  |             |                                                                                 |
| Others_2                                 | Yes: 14, 1865.7 (16647.8)<br>No: 155, 5169.9 (13438.9)                                                            |            |                                                                                  |             |                                                                                 |
| COVID-19 history<br>(before vaccination) | Yes:35, 15665.4 (34529.1)<br>No:235, 1316.1 (9022.3)                                                              | <0.001     | 16368.7<br>(12373.4 , 20363.9)                                                   | Excluded    |                                                                                 |
| COVID 19 history<br>(after vaccination)  | Yes:2, 18226.0 (-)<br>No:268, 2155.7 (11214.2)                                                                    | -          | -                                                                                |             |                                                                                 |

\* *p*2 refers to multivariate analysis excluding the parameter of the history of COVID-19 prior and after vaccination
