# Supplementary material for: Intensity of Humoral Immune Responses, Adverse Reactions, and Post-Vaccination Morbidity after Adenovirus Vector-Based and mRNA Anti-COVID-19 Vaccines
Source: MDPI journal article supplement (doi:10.3390/vaccines10081268), 2022-08-06
Supplement: s1 [file s1]

**Supplementary Table S2.** Multivariate analyses of anti-SARS-CoV-2 IgG responses after vaccination with Ad26.COV2.S and BNT162b2 vaccines

| Dependent Variable           | Parameter                              | <i>p</i> 1 | Coefficient                    | <i>p</i> 2* | Coefficient                    |
|------------------------------|----------------------------------------|------------|--------------------------------|-------------|--------------------------------|
| anti-S IgG levels on day 21  | Age                                    | 0.387      | 28.42 (-36.40 , 93.24)         | 0.153       | -15.84 (-37.63 , 5.95)         |
|                              | Vaccine type (Ad26.COV2.S vs BNT162b2) | 0.075      | -1212.2 (-2547.5 , 123.1)      | 0.003       | -681.8 (-1122.3 , -241.3)      |
|                              | Comorbidity (no vs ≥ 1)                | 0.536      | 491.0 (-1073.4 , 2055.5)       | 0.180       | -351.9 (-868.1 , 164.3)        |
|                              | COVID 19 history before vaccination    | <0.001     | 15937.0 (13937.2 , 17936.8)    | Excluded    |                                |
| anti-S IgG levels on day 42  | Age                                    | 0.757      | -20.60 ( -152.20 , 111.0)      | 0.114       | -110.6 (-248.1 , 26.8)         |
|                              | Vaccine type (Ad26.COV2.S vs BNT162b2) | <0.001     | -14830.1 (-17544.0 , -12116.1) | <0.001      | -13283.6 (-16032.5 , -10534.7) |
|                              | Comorbidity (no vs ≥ 1)                | 0.388      | -1378.8 (-4531.0 , 1773.3)     | 0.210       | -2029.5 (-5220.5 , 1161.6)     |
|                              | COVID 19 history before vaccination    | <0.001     | 10724.5 (6676.9 , 14772.2)     | Excluded    |                                |
|                              | COVID 19 history after vaccination     | 0.002      | 17966.0 (6825.2 , 29106.7)     |             |                                |
| anti-S IgG levels on day 90  | Age                                    | 0.230      | 50.86 (-32.60 , 134.31)        | 0.006       | -59.29 (-101.1 , -17.5)        |
|                              | Vaccine type (Ad26.COV2.S vs BNT162b2) | <0.001     | -3116.7 (-4842.7 , -1390.6)    | <0.001      | -2352.3 (-3198.1 , -1506.5)    |
|                              | Comorbidity (no vs ≥ 1)                | 0.673      | -429.8 (-2437.2 , 1577.8)      | 0.336       | -475.2 (-1450.4 , 499.9)       |
|                              | COVID 19 history before vaccination    | <0.001     | 5338.5 ( 2777.3 , 7899.6)      | Excluded    |                                |
|                              | COVID 19 history after vaccination     | <0.001     | 24529.8 (10620.8 , 18418.8)    |             |                                |
| anti-S IgG levels on day 180 | Age                                    | 0.294      | 56.15 (-49.41 , 161.70)        | 0.659       | -16.39 (-90.00 , 57.24)        |
|                              | Vaccine type (Ad26.COV2.S vs BNT162b2) | 0.684      | -424.2 (-2488.8 , 1640.4)      | 0.902       | -87.3 (-1315.7 , 1490.4)       |
|                              | Comorbidity (no vs ≥ 1)                | 0.489      | -789.6 (-3049.2 , 1470.0)      | 0.261       | -868.6 (-2396.9 , 659.7)       |
|                              | COVID 19 history before vaccination    | 0.074      | 2713.7 (-269.6 , 5697.0)       | Excluded    |                                |
|                              | COVID 19 history after vaccination     | <0.001     | 7857.6 (4381.5 , 11333.7)      |             |                                |

\* *p*2 refers to multivariate analysis excluding the parameter of the history of COVID-19 prior and after vaccination
