# Supplementary material for: Intensity of Humoral Immune Responses, Adverse Reactions, and Post-Vaccination Morbidity after Adenovirus Vector-Based and mRNA Anti-COVID-19 Vaccines
Source: MDPI journal article supplement (doi:10.3390/vaccines10081268), 2022-08-06
Supplement: s1 [file s1]

**Supplementary Table S3.** Multivariate analysis of intensity of anti-SARS-CoV-2 IgG responses on sampling day 42 after the first dose of BNT162b2 and Ad26.COV2.S vaccination

| Parameter                                    | N, median IgG levels (mg/dL) (IQR)                                 | <i>p</i> 1 | Coefficient                       | <i>p</i> 2 | Coefficient                       |
|----------------------------------------------|--------------------------------------------------------------------|------------|-----------------------------------|------------|-----------------------------------|
| Sex (male)                                   | Male:84, 4904.5 (12492.3)<br>Female:52, 4164.3, (14772.7)          |            |                                   |            |                                   |
| Age (years)                                  | rho =-0.184                                                        | 0.685      | 27.54 (-106.70 ,<br>161.79)       | 0.264      | -82.4 (-227.8 ,<br>63.0)          |
| Vaccination                                  | Ad26.COV2.S: 68, 436.5 (1095.7)<br>BNT162b2: 68, 12369.4 (17034.2) | <0.001     | -14881.7 (-17532.5<br>, -12230.9) | <0.001     | -13363.6 (-16101.1<br>, -10626.0) |
| Comorbidity (no vs<br>≥1)                    | ≥ 1: 37, 3893.2 (11063.0)<br>No:99, 5147.0 (13611.3)               |            |                                   |            |                                   |
| Comorbidity (0 vs<br>≥2)                     | ≥ 2:6, 4761.6, (17036.4)<br>No:130, 4865.6 (13394.2)               |            |                                   |            |                                   |
| Hypertension                                 | Yes:15, 2509.0, (9381.7)<br>No:121, 5080.6, (14324.5)              | 0.019      | -5505.9<br>(-10086.1 , -925.7)    | 0.095      | -3860.8<br>( -8400.0 , 678.4)     |
| Diabetes Mellitus                            | Yes:5, 7014.2 (18367.4)<br>No:131, 4773.3, (13390.8)               |            |                                   |            |                                   |
| Dyslipidemia                                 | Yes:7, 7014.2 (10067.3)<br>No:129, 4773.3 (13442.7)                |            |                                   |            |                                   |
| Chronic heart<br>disease                     | Yes:7, 7014.2 (9645.6)<br>No:129, 4773.3 (13457.9)                 |            |                                   |            |                                   |
| stroke/ TIA                                  | No:136, 4865.6, (13305.9)                                          |            |                                   |            |                                   |
| venous/ arterial<br>thromboses               | Yes:2, 2401.5 (-)<br>No:134, 4996.8, (13394.2)                     |            |                                   |            |                                   |
| Chronic respiratory<br>disease               | Yes:1<br>No:135, 4957.9, (13364.0)                                 |            |                                   |            |                                   |
| Autoimmune/<br>autoinflammatory<br>disorders | Yes:3, 4957.9 (-)<br>No:133, 4773.3 (13442.7)                      |            |                                   |            |                                   |
| Thyroid disease                              | Yes:8, 349.8 (24533.8)<br>No: 128, 4996.8 (13251.7)                |            |                                   |            |                                   |
| Chronic liver<br>disease                     | No:136, 4865.6, (13305.9)                                          |            |                                   |            |                                   |
| Chronic kidney<br>disease                    | Yes:1, -<br>No:135, 4773.3 (13078.1)                               |            |                                   |            |                                   |
| Cancer                                       | Yes:2, 20074.9<br>No:134, 7424.5 (13136.2)                         |            |                                   |            |                                   |
| Insomnia/<br>psychiatric diseases            | Yes:6, 4865.6 (13394.2)<br>No:130, 3794.8, (9945.8)                |            |                                   |            |                                   |
| Other                                        | Yes:7, 18802.5 (29765.4)<br>No:129, 4773.3 (12513.6)               |            |                                   |            |                                   |
| COVID 19 History<br>(before vaccination)     | Yes:18, 8767.2 (16179.5)<br>No:118, 3173.6 (12203.3)               | <0.001     | 10439.9 (6465.4 ,<br>14412.7)     | Excluded   |                                   |
| COVID 19 History<br>(inf bef42)              | Yes:2, 18226 (-)<br>No:134, 4333.3 (13158.7)                       | 0.001      | 18249.9 (7313.3 ,<br>29186.5)     |            |                                   |

\* *p*2 refers to multivariate analysis excluding the parameter of the history of COVID-19 prior and after vaccination
